# Supplementary material for: Plasma and Tissue Concentrations of α-Tocopherol and δ-Tocopherol Following High Dose Dietary Supplementation in Mice
Source: Nutrients. 2012 Jun 6;4(6):467–90. doi: 10.3390/nu4060467 (PMC3397347; doi:10.3390/nu4060467)
Supplement: Supplementary File 1: — XLSX-Document (XLSX, 47 KB) [file nutrients-04-00467-s001.xlsx]

## Sheet: Table S1. α-Toc concentrations
Table S1. Concentration of α-toc in plasma, brain, liver and adipose of Balb/cJ and C57Bl/6J mice following 4-week α-toc dietary supplement1,2.
Balb/cJ
gms α-toc/kg diet	Plasma	Brain	Liver	Adipose
Control	0.90(0.31)	1.10(0.23)	40.6(11.0)	16.0(16.0)
5	6.97(4.62)	1.75(0.36)	193(52.7)	104(94.2)
10	7.90(5.34)	1.75(0.24)	183(25.1)	64.3(40.4)
20	4.41(1.66)	1.49(0.30)	182(79.5)	89.3(116)
C57Bl/6J	Plasma	Brain	Liver	Adipose
gms α-toc/kg diet
Control	0.64(0.30)	1.46(0.28)	56.5(11.2)	56.6(43.6)
5	3.10(1.45)	2.32(0.56)	298(74.8)	86.3(107)
10	4.34(1.84)	2.38(0.42)	237(41.9)	87.6(110)
20	2.51(1.24)	2.57(0.97)	348(143)	177(172)
1 Concentrations in µM; Standard deviation in parentheses.
2 Statistical significance for ANOVA on these data shown in Figure 1.

## Sheet: Table S2. High dose α-toc path
Table S2. High dose α-toc path.
Four weeks supplemental dietary α-tocopherol (g/kg food)
Animal Treatment Group	ID	Tissue	Morphological Diagnosis	Modifier
BALB/cJ - CONTROL	N1-1	Kidney	No abnormal findings
		Heart	No abnormal findings
		Liver	No abnormal findings
		Skeletal muscle	No abnormal findings
		Brain	No abnormal findings
	N1-2	Kidney	No abnormal findings
		Heart	No abnormal findings
		Liver	No abnormal findings
		Skeletal muscle	No abnormal findings
		Brain	No abnormal findings
	N1-3	Kidney	No abnormal findings
		Heart	No abnormal findings
		Liver	No abnormal findings
		Skeletal muscle	No abnormal findings
		Brain	No abnormal findings
	N1-4	Kidney	No abnormal findings
		Heart	No abnormal findings
		Liver	No abnormal findings
		Skeletal muscle	No abnormal findings
		Brain	No abnormal findings
	N1-5	Kidney	No abnormal findings
		Heart	No abnormal findings
		Liver	No abnormal findings
		Skeletal muscle	No abnormal findings
		Brain	No abnormal findings
C57BL6/J - CONTROL	N5-1	Kidney	No abnormal findings
		Heart	No abnormal findings
		Liver	Hepatitis	subacute, multifocal, random, minimal
		Skeletal muscle	No abnormal findings
		Brain	No abnormal findings
	N5-2	Kidney	No abnormal findings
		Heart	No abnormal findings
		Liver	No abnormal findings
		Skeletal muscle	No abnormal findings
		Brain	No abnormal findings
	N5-3	Kidney	No abnormal findings
		Heart	No abnormal findings
		Liver	No abnormal findings
		Skeletal muscle	No abnormal findings
		Brain	No abnormal findings
	N5-4	Kidney	No abnormal findings
		Heart	No abnormal findings
		Liver	No abnormal findings
		Skeletal muscle	No abnormal findings
		Brain	No abnormal findings
	N5-5	Kidney	No abnormal findings
		Heart	No abnormal findings
		Liver	No abnormal findings
		Skeletal muscle	No abnormal findings
		Brain	No abnormal findings
BALB/cJ - 5g/kg α-tocopherol	N2-1	Kidney	No abnormal findings
		Heart	Epicardial mineralization	multifocal, mild
		Liver	Hepatitis	subacute, multifocal, random, minimal
		Skeletal muscle	No abnormal findings
		Brain	No abnormal findings
	N2-2	Kidney	No abnormal findings
		Heart	Epicarditis	subacute, focal, mild
		Liver	Eosinophilic focus of hepatocellular alteration	focal, minimal
		Skeletal muscle	No abnormal findings
		Brain	No abnormal findings
	N2-3	Kidney	No abnormal findings
		Heart	No abnormal findings
		Liver	No abnormal findings
		Skeletal muscle	No abnormal findings
		Brain	No abnormal findings
	N2-4	Kidney	No abnormal findings
		Heart	No abnormal findings
		Liver	Hepatitis	subacute, multifocal, random, minimal
		Skeletal muscle	No abnormal findings
		Brain	No abnormal findings
	N2-5	Kidney	No abnormal findings
		Heart	Epicardial mineralization	focal, mild
		Liver	No abnormal findings
		Skeletal muscle	No abnormal findings
		Brain	No abnormal findings
C57BL6/J - 5g/kg α-tocopherol	N6-1	Kidney	No abnormal findings
		Heart	No abnormal findings
		Liver	No abnormal findings
		Skeletal muscle	No abnormal findings
		Brain	No abnormal findings
	N6-2	Kidney	Lymphoid infiltrates	subpelvic, multifocal, minimal
		Heart	No abnormal findings
		Liver	Mineralization	focal, mild with interstitial fibrosis
		Skeletal muscle	No abnormal findings
		Brain	No abnormal findings
	N6-3	Kidney	No abnormal findings
		Heart	No abnormal findings
		Liver	Hepatitis	subacute, multifocal, random, minimal
		Skeletal muscle	No abnormal findings
		Brain	No abnormal findings
	N6-4	Kidney	No abnormal findings
		Heart	No abnormal findings
		Liver	Hepatitis	subacute, multifocal, random, minimal
		Skeletal muscle	No abnormal findings
		Brain	No abnormal findings
	N6-5	Kidney	No abnormal findings
		Heart	No abnormal findings
		Liver	Hepatitis	subacute, multifocal, random, minimal
		Skeletal muscle	No abnormal findings
		Brain	No abnormal findings
BALB/cJ - 10g/kg α-tocopherol	DN3-1	Kidney	No abnormal findings
		Heart	No abnormal findings
		Liver	No abnormal findings
		Skeletal muscle	No abnormal findings
		Brain	No abnormal findings
	DN3-2	Kidney	No abnormal findings
		Heart	No abnormal findings
		Liver	No abnormal findings
		Skeletal muscle	No abnormal findings
		Brain	No abnormal findings
	DN3-3	Kidney	No abnormal findings
		Heart	No abnormal findings
		Liver	No abnormal findings
		Skeletal muscle	No abnormal findings
		Brain	No abnormal findings
	DN3-4	Kidney	No abnormal findings
		Heart	No abnormal findings
		Liver	No abnormal findings
		Skeletal muscle	No abnormal findings
		Brain	No abnormal findings
	DN3-5	Kidney	No abnormal findings
		Heart	Myocarditis	acute to subacute, focal, heart base, mild
		Liver	No abnormal findings
		Skeletal muscle	No abnormal findings
		Brain	No abnormal findings
C57BL6/J - 10g/kg α-tocopherol	DN7-1	Kidney	No abnormal findings
		Heart	No abnormal findings
		Liver	No abnormal findings
		Skeletal muscle	No abnormal findings
		Brain	No abnormal findings
	DN7-2	Kidney	No abnormal findings
		Heart	No abnormal findings
		Liver	No abnormal findings
		Skeletal muscle	No abnormal findings
		Brain	No abnormal findings
	DN7-3	Kidney	No abnormal findings
		Heart	No abnormal findings
		Liver	No abnormal findings
		Skeletal muscle	No abnormal findings
		Brain	No abnormal findings
	DN7-4	Kidney	No abnormal findings
		Heart	No abnormal findings
		Liver	No abnormal findings
		Skeletal muscle	No abnormal findings
		Brain	No abnormal findings
	DN7-5	Kidney	No abnormal findings
		Heart	No abnormal findings
		Liver	No abnormal findings
		Skeletal muscle	No abnormal findings
		Brain	No abnormal findings
BALB/cJ - 20g/kg α-tocopherol	N4-1	Kidney	No abnormal findings
		Heart	No abnormal findings
		Liver	No abnormal findings
		Skeletal muscle	No abnormal findings
		Brain	No abnormal findings
	N4-2	Kidney	No abnormal findings
		Heart	No abnormal findings
		Liver	No abnormal findings
		Skeletal muscle	No abnormal findings
		Brain	No abnormal findings
	N4-3	Kidney	No abnormal findings
		Heart	Epicardial mineralization	multifocal, mild
		Liver	No abnormal findings
		Skeletal muscle	No abnormal findings
		Brain	No abnormal findings
	N4-4	Kidney	No abnormal findings
		Heart	No abnormal findings
		Liver	No abnormal findings
		Skeletal muscle	No abnormal findings
		Brain	No abnormal findings
	N4-5	Kidney	No abnormal findings
		Heart	No abnormal findings
		Liver	No abnormal findings
		Skeletal muscle	No abnormal findings
		Brain	No abnormal findings
C57BL6/J - 20g/kg α-tocopherol	N8-1	Kidney	No abnormal findings
		Heart	No abnormal findings
		Liver	No abnormal findings
		Skeletal muscle	No abnormal findings
		Brain	No abnormal findings
	N8-2	Kidney	No abnormal findings
		Heart	No abnormal findings
		Liver	Hepatitis	subacute, multifocal, random, minimal
		Skeletal muscle	No abnormal findings
		Brain	No abnormal findings
	N8-3	Kidney	No abnormal findings
		Heart	No abnormal findings
		Liver	No abnormal findings
		Skeletal muscle	No abnormal findings
		Brain	No abnormal findings
	N8-4	Kidney	No abnormal findings
		Heart	No abnormal findings
		Liver	Hepatocellular vacuolar change	macrovesicular, mid‐zonal, multifocal, mild
		Skeletal muscle	No abnormal findings
		Brain	No abnormal findings
	N8-5	Kidney	No abnormal findings
		Heart	No abnormal findings
		Liver	Hepatocellular vacuolar change	macrovesicular, mid‐zonal, multifocal, mild
		Skeletal muscle	No abnormal findings
		Brain	No abnormal findings

## Sheet: Figure S1. P.O. δ-toc PK
Figure S1. Pharmacokinetic parameters of δ-tocopherol after p.o. administration in male C57BL/6 mice.
Group 2 - δ-tocopherol after a PO dose of 10 mg/kg						Group 3 - δ-tocopherol after a PO dose of 50 mg/kg						Group 4 - δ-tocopherol after a PO dose of 250 mg/kg
Dose	Dose	PK parameters	Plasma	Brain	Liver	Dose	Dose	PK parameters	Plasma	Brain	Liver	Dose	Dose	PK parameters	Plasma	Brain	Liver
(mg/kg)	route	(unit)				(mg/kg)	route	(unit)				(mg/kg)	route	(unit)
10	PO	Tmax (hr)	2	NA	2	50	PO	Tmax (hr)	4	NA	4	250	PO	Tmax (hr)	2	NA	4
	N=3	Cmax (ng/mL)	376	NA	538		N=3	Cmax (ng/mL)	2660	NA	5810		N=3	Cmax (ng/mL)	6910	NA	10800
		T1/2 (hr)	2.85	NA	3.31			T1/2 (hr)	10.3	NA	15.3			T1/2 (hr)	12.6	NA	13.4
		AUClast (hr*ng/mL)	1710	NA	2520			AUClast (hr*ng/mL)	19600	NA	40500			AUClast (hr*ng/mL)	43300	NA	96000
		AUCINF(hr*ng/mL)	1850	NA	3280			AUCINF(hr*ng/mL)	21000	NA	43100			AUCINF(hr*ng/mL)	44900	NA	99300
		AUCtissue/AUCplasma (%)	NA	NA	177.297			AUCtissue/AUCplasma (%)	NA	NA	205.238			AUCtissue/AUCplasma (%)	NA	NA	221.158
Group 5-δ-tocopherol after a cassette PO dose of 10 mg/kg δ-tocopherol and 240 mg/kg sesamin						Group 6 - δ-tocopherol after a cassette PO dose of 50 mg/kg δ-tocopherol and 240 mg/kg sesamin						Group 7 - δ-tocopherol after a cassette PO dose of 250 mg/kg δ-tocopherol and 240 mg/kg sesamin
Dose	Dose	PK parameters	Plasma	Brain	Liver	Dose	Dose	PK parameters	Plasma	Brain	Liver	Dose	Dose	PK parameters	Plasma	Brain	Liver
(mg/kg)	route	(unit)				(mg/kg)	route	(unit)				(mg/kg)	route	(unit)
10/240	PO	Tmax (hr)	4	NA	4	50/240	PO	Tmax (hr)	4	NA	4	250/240	PO	Tmax (hr)	2	NA	4
	N=3	Cmax (ng/mL)	883	NA	2820		N=3	Cmax (ng/mL)	2140	NA	4580		N=3	Cmax (ng/mL)	7150	NA	18400
		T1/2 (hr)	9.95	NA	10.3			T1/2 (hr)	14.9	NA	10			T1/2 (hr)	11.2	NA	15.7
		AUClast (hr*ng/mL)	5420	NA	16200			AUClast (hr*ng/mL)	22400	NA	42100			AUClast (hr*ng/mL)	59600	NA	173000
		AUCINF(hr*ng/mL)	6220	NA	18900			AUCINF(hr*ng/mL)	26800	NA	44700			AUCINF(hr*ng/mL)	64700	NA	188000
		AUCtissue/AUCplasma (%)	NA	NA	303.859			AUCtissue/AUCplasma (%)	NA	NA	166.791			AUCtissue/AUCplasma (%)	NA	NA	290.572
Notes:
1. The linearity range of sesamin standard curves was 10.0-10000 ng/mL in plasma and 40.0-40000 ng/mL in brain and liver samples.
The linearity range of δ-tocopherol standard curves was 20.0-10000 ng/mL in plasma and 80.0-80000 ng/mL in brain and liver samples.
2. The average base levels of δ-tocopherol and sesamin in plasma, brain and liver were obtained from 21 naive mice.
3. The base levels of δ-tocopherol and sesamin in blank plasma, brain and liver samples were all detectable, but beyond the linearity range of the standard curves. So the 0 (pre-dose) concentration in plasma, brain and liver samples was set to BQL based on the current LLOQ.
4. No clinical findings were observed during the entire in life study.
5. The p.o. dosing solutions for all 7 groups were prepared in 100% corn oil. The appearance of the dosing solutions for group 1-4 were clear and suspension for group 5-7.
6. Brain and liver samples was homogenized with 3 volumes of PBS (pH 7.4) before sample extraction. The final brain concentration was adjusted with a dilution of 4, assuming 1 g wet brain equals to 1 mL.
7. NA = Not available.

## Sheet: Table S3. High dose δ-toc path
Table S3. High dose δ-toc path.
Four to five weeks supplemental δ-tocopherol (g/kg food)
Animal Treatment Group	ID	Tissue	Morphological Diagnosis	Modifier
Control	F1 9171	Liver	Lymphoid infiltrates	multifocal, portal and centrilobular, minimal
	F1 9172	Liver	Lymphoid infiltrates	multifocal, portal and centrilobular, minimal
	F1 9173	Liver	Lymphoid infiltrates	multifocal, random, minimal to mild
	F1 9174	Liver	Lymphoid infiltrates	multifocal, portal and centrilobular, minimal
	F1 9175	Liver	Lymphoid infiltrates	Lymphoid infiltrates, multifocal, portal and centrilobular, minimal
0.33 g d-toc	G2 9191	Liver	Lymphoid infiltrates	multifocal, portal and centrilobular, minimal
	G2 9192	Liver	Lymphoid infiltrates / Hepatitis	multifocal, portal and centrilobular, minimal / acute, focal, minimal (non-specific)
	G2 9193	Liver	Lymphoid infiltrates / Hepatitis	multifocal, portal, minimal / acute, focal, minimal (non-specific)
	G2 9194	Liver	Lymphoid infiltrates	multifocal, portal and centrilobular, minimal
	G2 9195	Liver	Lymphoid infiltrates / Hepatitis	multifocal, portal and centrilobular, minimal / acute, multifocal, random, minimal (non-specific)
1.67 g d-toc	H1 9196	Liver	Lymphoid infiltrates	multifocal, portal, minimal
	H1 9197	Liver	Lymphoid infiltrates	multifocal, random, minimal
	H1 9198	Liver	Lymphoid infiltrates	multifocal, random, minimal
	H1 9199	Liver	Lymphoid infiltrates	multifocal, random, minimal
	H1 9200	Liver	No abnormal findings
1.67 g d-toc	H3 8306	Liver	Hepatitis	acute, multifocal, random, minimal (non-specific)
	H3 8307	Liver	Lymphoid infiltrates	multifocal, random, minimal
	H3 8308	Liver	No abnormal findings
	H3 8309	Liver	Lymphoid infiltrates	multifocal, portal, minimal
	H3 8310	Liver	No abnormal findings
1.67 g d-toc + 2 g sesamin	L7-1	Liver	Lymphoid infiltrates / Hepatitis	multifocal, random, minimal / acute, multifocal, random, minimal (non-specific)
	L7-2	Liver	Hepatitis	acute, multifocal, random, minimal
	L7-3	Liver	Lymphoid infiltrates / Hepatitis	multifocal, random, minimal / acute, focal, minimal (non-specific)
	L7-4	Liver	Lymphoid infiltrates	multifocal, portal and centrilobular, minimal
	L7-5	Liver	Lymphoid infiltrates	multifocal, random, minimal
